# Supplementary material for: Quality of life, level of functioning, and its relationship with mental and physical disorders in the elderly: results from the MentDis_ICF65+ study
Source: Springer Nature journal article supplement (doi:10.1186/s12955-020-01310-6), 2020-03-06
Supplement: MOESM1 [file 12955_2020_1310_MOESM1_ESM.pdf]

|         |      |   |   |   |   |   |   |   |   |   |   |   |   |   |
|---------|------|---|---|---|---|---|---|---|---|---|---|---|---|---|
|         | 50th | 2 | 2 | 2 | 2 | 2 | 2 | 2 | 2 | 2 | 2 | 2 | 2 | 2 |
|         | 75th | 2 | 2 | 2 | 2 | 2 | 2 | 3 | 2 | 2 | 2 | 2 | 2 | 2 |
|         | 90th | 3 | 3 | 3 | 2 | 3 | 3 | 6 | 3 | 4 | 3 | 3 | 2 | 5 |
|         | 95th | 5 | 5 | 5 | 4 | 4 | 5 | 7 | 4 | 6 | 4 | 6 | 3 | 8 |
| Society | 25th | 2 | 2 | 2 | 2 | 2 | 2 | 2 | 2 | 2 | 2 | 2 | 2 | 2 |
|         | 50th | 3 | 2 | 3 | 2 | 3 | 3 | 3 | 3 | 3 | 2 | 2 | 2 | 3 |
|         | 75th | 4 | 4 | 4 | 4 | 4 | 4 | 5 | 4 | 4 | 4 | 4 | 4 | 5 |
|         | 90th | 6 | 5 | 6 | 5 | 5 | 5 | 6 | 6 | 5 | 5 | 6 | 5 | 7 |
|         | 95th | 6 | 6 | 7 | 6 | 6 | 6 | 7 | 6 | 6 | 6 | 7 | 6 | 8 |
