# Supplementary material for: Quality of life, level of functioning, and its relationship with mental and physical disorders in the elderly: results from the MentDis_ICF65+ study
Source: Springer Nature journal article supplement (doi:10.1186/s12955-020-01310-6), 2020-03-06
Supplement: MOESM2 [file 12955_2020_1310_MOESM2_ESM.pdf]

Online supplemental Table 2. Regression analysis of the socio-demographic, mental and physical disorders on WHODAS II and WHO-QoL Bref (adjusted for age group, sex (and interaction if significant) as well as study centre)

|                                                                      | WHODAS II TOTAL         |                  | WHOQoL-BREF                      |                  |                                      |              |                              |              |                               |                  |
|----------------------------------------------------------------------|-------------------------|------------------|----------------------------------|------------------|--------------------------------------|--------------|------------------------------|--------------|-------------------------------|------------------|
|                                                                      | b<br>[95%-CI]           | p-value          | PHYSICAL HEALTH<br>b<br>[95%-CI] | p-value          | SOCIAL RELATIONSHIP<br>b<br>[95%-CI] | p-value      | ENVIRONMENT<br>b<br>[95%-CI] | p-value      | GLOBAL SCORE<br>b<br>[95%-CI] | p-value          |
| <b>Parents Born In Same Country</b> (ref. No)                        |                         |                  |                                  |                  |                                      |              |                              |              |                               |                  |
| - Yes                                                                | 1.18<br>[-0.04; 2.41]   | <b>0.057</b>     | -0.49<br>[-7.94; 6.96]           | 0.892            | -3.63<br>[-8.03; 0.76]               | 0.100        | -0.87<br>[-4.45; 2.70]       | 0.616        | -2.72<br>[-6.17; 0.74]        | 0.117            |
| <b>Marital Status (3 Categories)</b> (ref. Never Been Married/Other) |                         |                  |                                  |                  |                                      |              |                              |              |                               |                  |
| - Married                                                            | -6.73<br>[-20.17; 6.72] | 0.309            | 8.69<br>[-1.57; 18.96]           | 0.093            | -3.33<br>[-21.72; 15.07]             | 0.710        | 4.14<br>[-2.83; 11.10]       | 0.230        | 7.48<br>[1.48; 13.49]         | <b>0.017</b>     |
| - Separated/Divorced/Widowed                                         | -6.20<br>[-19.71; 7.32] | 0.350            | 6.69<br>[-4.30; 17.68]           | 0.219            | 0.21<br>[-17.96; 18.38]              | 0.981        | 3.15<br>[-4.52; 10.83]       | 0.402        | 8.15<br>[1.00; 15.31]         | <b>0.028</b>     |
| <b>Work Status</b> (ref. Retired)                                    |                         |                  |                                  |                  |                                      |              |                              |              |                               |                  |
| - Homemaker/Housewife                                                | 1.06<br>[0.20; 1.92]    | <b>0.018</b>     | -0.93<br>[-3.52; 1.65]           | 0.460            | 1.74<br>[-2.41; 5.89]                | 0.392        | 1.38<br>[-1.27; 4.03]        | 0.290        | -4.40<br>[-8.41; -0.40]       | <b>0.033</b>     |
| - Working/Employed                                                   | -0.34<br>[-1.40; 0.72]  | 0.512            | 3.95<br>[1.06; 6.84]             | <b>0.010</b>     | 1.98<br>[-0.81; 4.77]                | 0.154        | -0.69<br>[-3.84; 2.47]       | 0.654        | -2.13<br>[-5.91; 1.64]        | 0.252            |
| - Other                                                              | -1.00<br>[-2.79; 0.79]  | 0.259            | 1.86<br>[-4.65; 8.37]            | 0.558            | 0.71<br>[-5.04; 6.46]                | 0.800        | -3.94<br>[-14.77; 6.89]      | 0.457        | 2.09<br>[-5.78; 9.96]         | 0.586            |
| <b>Work Status Of Spouse/Partner</b> (ref. Retired)                  |                         |                  |                                  |                  |                                      |              |                              |              |                               |                  |
| - Homemaker/Housewife                                                | 0.21<br>[-0.62; 1.04]   | 0.605            | -1.94<br>[-5.37; 1.49]           | 0.251            | 0.55<br>[-0.95; 2.04]                | 0.455        | -0.19<br>[-3.11; 2.73]       | 0.892        | -1.03<br>[-2.73; 0.68]        | 0.223            |
| - Working/Employed                                                   | -0.91<br>[-1.78; -0.04] | <b>0.042</b>     | 1.98<br>[-0.80; 4.76]            | 0.153            | 0.10<br>[-2.92; 3.11]                | 0.947        | -0.01<br>[-3.76; 3.74]       | 0.997        | 1.93<br>[-1.52; 5.37]         | 0.257            |
| - Unemployed                                                         | -0.89<br>[-4.07; 2.30]  | 0.568            | -0.09<br>[-7.06; 6.87]           | 0.978            | -12.51<br>[-25.75; 0.73]             | 0.063        | -0.69<br>[-6.82; 5.45]       | 0.818        | -6.15<br>[-18.32; 6.01]       | 0.304            |
| - Other                                                              | -0.51<br>[-2.86; 1.83]  | 0.652            | 3.91<br>[-3.80; 11.63]           | 0.302            | -2.51<br>[-13.76; 8.75]              | 0.647        | 1.11<br>[-7.42; 9.63]        | 0.790        | 2.37<br>[-6.41; 11.15]        | 0.579            |
| <b>Rate Degree Of Care Burden</b> (ref. A Lot Of Burden)             |                         |                  |                                  |                  |                                      |              |                              |              |                               |                  |
| - No Burden                                                          | -1.01<br>[-2.81; 0.79]  | 0.256            | 0.20<br>[-7.06; 7.46]            | 0.955            | 3.01<br>[-1.05; 7.07]                | 0.138        | 5.98<br>[2.21; 9.75]         | <b>0.003</b> | 5.68<br>[1.65; 9.70]          | <b>0.008</b>     |
| - Some Burden                                                        | -0.80<br>[-2.79; 1.20]  | 0.417            | 1.23<br>[-7.82; 10.28]           | 0.780            | 0.91<br>[-3.87; 5.69]                | 0.696        | 6.53<br>[1.20; 11.87]        | <b>0.019</b> | 4.12<br>[-1.56; 9.80]         | 0.146            |
| <b>Financial Situation</b> (ref. Very Good)                          |                         |                  |                                  |                  |                                      |              |                              |              |                               |                  |
| - Good                                                               | 1.49<br>[0.52; 2.46]    | <b>0.004</b>     | -6.68<br>[-8.85; -4.52]          | <b>&lt;0.001</b> | -3.29<br>[-7.46; 0.89]               | 0.116        | -4.25<br>[-8.63; 0.12]       | 0.056        | -4.57<br>[-8.43; -0.71]       | <b>0.023</b>     |
| - Just Enough                                                        | 2.76<br>[1.69; 3.84]    | <b>&lt;0.001</b> | -9.34<br>[-13.85; -4.83]         | <b>&lt;0.001</b> | -6.03<br>[-9.95; -2.12]              | <b>0.004</b> | -6.28<br>[-11.77; -0.79]     | <b>0.027</b> | -8.04<br>[-12.99; -3.08]      | <b>0.003</b>     |
| - Poor                                                               | 5.33<br>[2.93; 7.72]    | <b>&lt;0.001</b> | -14.10<br>[-19.77; -8.43]        | <b>&lt;0.001</b> | -7.59<br>[-11.85; -3.33]             | <b>0.001</b> | -9.14<br>[-15.93; -2.35]     | <b>0.011</b> | -14.70<br>[-20.76; -8.63]     | <b>&lt;0.001</b> |
| - Very Poor                                                          | -1.58<br>[-5.70; 2.55]  | 0.435            | -6.38<br>[-25.66; 12.91]         | 0.498            | -14.23<br>[-30.10; 1.65]             | 0.076        | -4.04<br>[-14.51; 6.43]      | 0.430        | -13.39<br>[-28.51; 1.73]      | 0.080            |
| <b>Frequency Of Financial Problems</b> (ref. Never)                  |                         |                  |                                  |                  |                                      |              |                              |              |                               |                  |
| - Rarely                                                             | -0.18<br>[-1.05; 0.68]  | 0.663            | -1.89<br>[-4.25; 0.47]           | 0.110            | -1.87<br>[-3.04; -0.71]              | <b>0.003</b> | -0.89<br>[-2.66; 0.87]       | 0.303        | -1.57<br>[-3.65; 0.51]        | 0.131            |
| - Often                                                              | 0.36<br>[-1.93; 2.65]   | 0.747            | -5.65<br>[-8.77; -2.53]          | <b>0.001</b>     | -1.28<br>[-5.37; 2.81]               | 0.521        | -0.54<br>[-5.12; 4.03]       | 0.806        | -4.91<br>[-11.81; 1.98]       | 0.153            |
| - Always                                                             | 4.30<br>[1.24; 7.36]    | <b>0.008</b>     | -13.46<br>[-21.39; -5.53]        | <b>0.002</b>     | -3.50<br>[-10.17; 3.17]              | 0.287        | -4.28<br>[-11.11; 2.55]      | 0.206        | -7.62<br>[-17.28; 2.05]       | 0.116            |
| <b>Religious Affiliation</b> (ref. Very Important)                   |                         |                  |                                  |                  |                                      |              |                              |              |                               |                  |
| - Somewhat Important                                                 | -0.40<br>[-1.45; 0.64]  | 0.430            | 0.75<br>[-2.23; 3.72]            | 0.606            | -0.12<br>[-2.22; 1.97]               | 0.905        | -2.80<br>[-5.40; -0.21]      | 0.035        | -0.89<br>[-3.55; 1.77]        | 0.492            |
| - Not Very Important                                                 | -1.13<br>[-2.02; -0.24] | <b>0.015</b>     | 1.06<br>[-2.74; 4.86]            | 0.566            | -2.13<br>[-4.68; 0.43]               | 0.098        | -2.55<br>[-5.17; 0.07]       | 0.056        | -1.22<br>[-3.73; 1.29]        | 0.324            |
| - Not At All                                                         | -0.75<br>[-1.87; 0.37]  | 0.179            | 0.40<br>[-1.50; 2.31]            | 0.663            | -1.41<br>[-4.64; 1.82]               | 0.374        | -2.51<br>[-5.85; 0.83]       | 0.133        | -0.32<br>[-3.77; 3.12]        | 0.847            |
| <b>Years Of Schooling (Cut Off 13 Years)</b>                         | -0.11<br>[-0.30; 0.09]  | 0.266            | 0.37<br>[-0.04; 0.79]            | 0.074            | 0.17<br>[-0.22; 0.57]                | 0.370        | 0.15<br>[-0.26; 0.56]        | 0.459        | 0.28<br>[-0.13; 0.70]         | 0.166            |
| <b>Number Of Household Members (Number Of</b>                        | 0.36                    | 0.153            | -0.62                            | 0.587            | -0.60                                | 0.653        | -0.18                        | 0.900        | 0.55                          | 0.393            |

| People) Sum Score                                                           | [-0.15; 0.86]           | [-2.95; 1.72]    | [-3.33; 2.13]            | [-3.20; 2.83]    | [-0.76; 1.85]           |                  |                          |                  |                           |                  |
|-----------------------------------------------------------------------------|-------------------------|------------------|--------------------------|------------------|-------------------------|------------------|--------------------------|------------------|---------------------------|------------------|
| Number Of Children                                                          | 0.05<br>[-0.44; 0.54]   | 0.829            | -0.43<br>[-1.37; 0.51]   | 0.349            | -1.02<br>[-1.57; -0.46] | <b>0.001</b>     | -0.25<br>[-1.34; 0.84]   | 0.638            | -0.55<br>[-1.23; 0.13]    | 0.107            |
| Number Of Grandchildren                                                     | 0.05<br>[-0.10; 0.21]   | 0.485            | 0.23<br>[-0.27; 0.73]    | 0.343            | 0.23<br>[-0.15; 0.61]   | 0.230            | -0.03<br>[-0.46; 0.41]   | 0.898            | 0.33<br>[-0.09; 0.74]     | 0.118            |
| Number Of Current Close Significant (Cut Off 50 People)                     | -0.04<br>[-0.08; -0.00] | <b>0.032</b>     | 0.07<br>[-0.08; 0.22]    | 0.340            | 0.22<br>[0.12; 0.31]    | <b>&lt;0.001</b> | 0.03<br>[-0.07; 0.13]    | 0.573            | 0.09<br>[-0.03; 0.21]     | 0.151            |
| Number Of Different Sources Of Household Income Sum Score                   | -0.24<br>[-0.65; 0.17]  | 0.231            | -0.96<br>[-2.70; 0.78]   | 0.263            | -0.73<br>[-2.39; 0.92]  | 0.364            | 0.19<br>[-1.25; 1.62]    | 0.787            | 0.08<br>[-1.10; 1.26]     | 0.888            |
| Any Anxiety Disorder (Year) (ref. No)<br>- Yes                              | 0.63<br>[-1.05; 2.31]   | 0.444            | -5.92<br>[-10.05; -1.79] | <b>0.007</b>     | 1.73<br>[-0.72; 4.18]   | 0.156            | -2.16<br>[-5.99; 1.67]   | 0.253            | -6.26<br>[-10.32; -2.20]  | <b>0.004</b>     |
| Any Affective Disorder (Year) (ref. No)<br>- Yes                            | 0.81<br>[-2.04; 3.67]   | 0.559            | -8.06<br>[-13.63; -2.50] | <b>0.007</b>     | -3.19<br>[-8.82; 2.45]  | 0.252            | -0.93<br>[-7.58; 5.71]   | 0.773            | -12.81<br>[-23.59; -2.03] | <b>0.022</b>     |
| Any Major Depressive Disorder (Year) (ref. No)<br>- Yes                     | -0.27<br>[-2.69; 2.15]  | 0.818            | 3.60<br>[-2.16; 9.37]    | 0.207            | -3.55<br>[-6.90; -0.20] | <b>0.039</b>     | -2.94<br>[-7.50; 1.62]   | 0.194            | 8.28<br>[-2.47; 19.04]    | 0.124            |
| Any Somatoform Disorder (Year) (ref. No)<br>- Yes                           | 5.34<br>[3.40; 7.29]    | <b>0.001</b>     | -8.10<br>[-14.57; -1.63] | <b>0.017</b>     | -4.04<br>[-8.46; 0.38]  | 0.071            | -7.72<br>[-12.75; -2.69] | <b>0.004</b>     | -7.58<br>[-10.99; -4.17]  | <b>&lt;0.001</b> |
| Any Mental Disorder - Without Nicotine Dependence (Year) (ref. No)<br>- Yes | 1.36<br>[0.02; 2.69]    | <b>0.046</b>     | 0.28<br>[-2.10; 2.67]    | 0.806            | -1.63<br>[-4.15; 0.89]  | 0.193            | -0.61<br>[-2.87; 1.65]   | 0.579            | 1.06<br>[-2.27; 4.38]     | 0.516            |
| Any Heart Disorder (ref. No)<br>- Yes                                       | 1.08<br>[0.27; 1.89]    | <b>&lt;0.011</b> | -5.55<br>[-8.44; -2.65]  | <b>0.001</b>     | -0.95<br>[-2.97; 1.06]  | 0.336            | -3.62<br>[-5.36; -1.87]  | <b>&lt;0.001</b> | -2.32<br>[-3.84; -0.79]   | <b>0.005</b>     |
| Any CNS Disorder (ref. No)<br>- Yes                                         | 2.20<br>[0.93; 3.48]    | <b>0.002</b>     | -6.95<br>[-9.95; -3.96]  | <b>&lt;0.001</b> | -3.96<br>[-7.53; -0.38] | <b>0.032</b>     | -4.12<br>[-7.20; -1.03]  | <b>0.011</b>     | -8.53<br>[-10.80; -6.25]  | <b>&lt;0.001</b> |
| Any Musculoskeletal Disorder (ref. No)<br>- Yes                             | 1.92<br>[0.95; 2.88]    | <b>&lt;0.001</b> | -6.06<br>[-8.32; -3.80]  | <b>&lt;0.001</b> | -1.81<br>[-3.89; 0.26]  | 0.084            | -2.46<br>[-4.63; -0.30]  | <b>0.028</b>     | -3.80<br>[-5.63; -1.98]   | <b>&lt;0.001</b> |
| Any Respiratory Disorder (ref. No)<br>- Yes                                 | 1.56<br>[0.57; 2.54]    | <b>0.004</b>     | -4.99<br>[-7.92; -2.05]  | <b>0.002</b>     | -2.04<br>[-4.76; 0.68]  | 0.134            | -0.77<br>[-3.23; 1.69]   | 0.521            | -4.56<br>[-6.51; -2.61]   | <b>&lt;0.001</b> |
| Any Gastrointestinal Disorder (ref. No)<br>- Yes                            | -0.32<br>[-1.12; 0.48]  | 0.410            | 1.27<br>[-1.81; 4.34]    | 0.401            | -1.60<br>[-4.25; 1.05]  | 0.221            | -0.87<br>[-2.77; 1.04]   | 0.353            | -2.22<br>[-4.49; 0.05]    | 0.055            |
| Any Genitourinary Disorder (ref. No)<br>- Yes                               | 1.78<br>[0.42; 3.14]    | <b>0.013</b>     | -3.71<br>[-7.23; -0.19]  | <b>0.040</b>     | 3.22<br>[-1.18; 7.61]   | 0.143            | 1.87<br>[-1.39; 5.12]    | 0.246            | -3.43<br>[-8.06; 1.21]    | 0.138            |
| Any Endocrinological Disorder (ref. No)<br>- Yes                            | 0.42<br>[-0.26; 1.10]   | 0.209            | -6.04<br>[-8.50; -3.59]  | <b>0.000</b>     | -0.86<br>[-3.03; 1.30]  | 0.416            | 0.57<br>[-1.85; 2.99]    | 0.626            | -3.84<br>[-6.27; -1.42]   | <b>0.004</b>     |
| Any Cancer Disorder (ref. No)<br>- Yes                                      | 0.21<br>[-0.71; 1.14]   | 0.635            | -6.49<br>[-11.53; -1.46] | <b>0.014</b>     | 2.89<br>[0.72; 5.07]    | <b>0.012</b>     | 0.82<br>[-3.39; 5.03]    | 0.689            | -7.37<br>[-12.38; -2.37]  | <b>0.006</b>     |
| Any Dermatological Disorder (ref. No)<br>- Yes                              | 0.87<br>[-0.88; 2.63]   | 0.313            | -0.10<br>[-6.20; 5.99]   | 0.972            | -1.75<br>[-6.94; 3.44]  | 0.490            | -0.23<br>[-3.77; 3.31]   | 0.892            | -1.30<br>[-5.89; 3.29]    | 0.562            |
| Any Other Disorder (ref. No)<br>- Yes                                       | 1.37<br>[0.19; 2.56]    | <b>0.025</b>     | -5.88<br>[-10.12; -1.63] | <b>0.009</b>     | 0.42<br>[-2.97; 3.81]   | 0.799            | -1.48<br>[-3.50; 0.55]   | 0.144            | -2.72<br>[-7.14; 1.70]    | 0.214            |
